# Supplementary material for: Biosynthetic Potentials of Metabolites and Their Hierarchical Organization
Source: PubMed Central journal article supplement (PMC2289774; doi:10.1371/journal.pcbi.1000049), 2008-04-04
Supplement: pcbi.1000049.s004.pdf [file pcbi.1000049.s004.pdf]

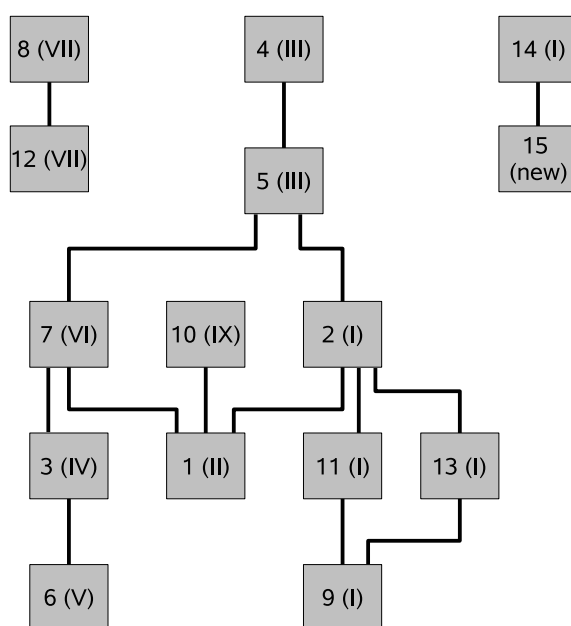

Figure S4: **Hierarchy of metabolites for anaerobic conditions for a network curated with strict criteria.** Same as Figure S3, but only water (and no oxygen) has been added to the seeds. Here, an interesting effect can be observed: Former cluster I splits into a number of subclusters, indicating that the effect of oxygen is more pronounced for this network containing only a limited set of reactions. A possible explanation is that important oxidizing/reducing reactions using other oxidants than oxygen are not included. Remarkably, the remaining clusters are still ordered analogously to the hierarchies displayed in Figs. S1–S3.
