# Supplementary material for: Biosynthetic Potentials of Metabolites and Their Hierarchical Organization
Source: PubMed Central journal article supplement (PMC2289774; doi:10.1371/journal.pcbi.1000049), 2008-04-04
Supplement: pcbi.1000049.s005.pdf [file pcbi.1000049.s005.pdf]

Table S1: **Mapping of the cluster identifiers I–XIII used in the text to the identifiers found in the supplementary data files.** The internal numbering of the clusters is automatically done by the cluster identification algorithm which sorts the identified clusters by decreasing size. Therefore, same numbers do not necessarily stand for corresponding clusters of different scenarios. This table gives the cluster numbers which correspond to the thirteen clusters I–XIII which are discussed in the text.

| Label | dataset S1 | S2 (semiStrict) | S2 (semiStrict_no_o2) |
|-------|------------|-----------------|-----------------------|
| I     | 1          | 1               | 1                     |
| II    | 2          | 2               | 2                     |
| III   | 3          | 3               | 3                     |
| IV    | 4          | 4               | 4                     |
| V     | 5          | 5               | 5                     |
| VI    | 6          | 7               | 6                     |
| VII   | 7          | 6               | 7                     |
| VIII  | 8          | 8               | 31                    |
| IX    | 9          | 9               | 10                    |
| X     | 10         | 12              | 13                    |
| XI    | 11         | 14              | 18                    |
| XII   | 12         | 15              | 19                    |
| XIII  | 63         | 19              | 15                    |
