# Supplementary material for: Biosynthetic Potentials of Metabolites and Their Hierarchical Organization
Source: PubMed Central journal article supplement (PMC2289774; doi:10.1371/journal.pcbi.1000049), 2008-04-04
Supplement: pcbi.1000049.s006.pdf [file pcbi.1000049.s006.pdf]

Table S2: **Comparison of the clustering results for networks derived from two different versions of the KEGG database.** 'Old' refers to a database version from January 2005, 'new' refers to a version from December 2007. In the upper table the cluster sizes are given, the overlaps between corresponding clusters as well as the Jaccard coefficient quantifying the similarity. The lower table holds corresponding information on the consensus scopes characterizing the clusters.

### Clusters

| Label | old size | new size | overlap | Jaccard coefficient |
|-------|----------|----------|---------|---------------------|
| I     | 261      | 306      | 248     | 0.78                |
| II    | 183      | 217      | 168     | 0.72                |
| III   | 102      | 103      | 100     | 0.95                |
| IV    | 57       | 59       | 54      | 0.87                |
| V     | 41       | 43       | 36      | 0.75                |
| VI    | 34       | 25       | 19      | 0.48                |
| VII   | 23       | 34       | 21      | 0.58                |
| VIII  | 22       | 22       | 20      | 0.83                |
| IX    | 19       | 19       | 19      | 1                   |
| X     | 13       | 12       | 11      | 0.79                |
| XI    | 12       | 10       | 10      | 0.83                |
| XII   | 10       | 10       | 10      | 1                   |
| XIII  | 4        | 9        | 4       | 0.44                |

### Consensus scopes

| Label | old size | new size | overlap | Jaccard coefficient |
|-------|----------|----------|---------|---------------------|
| I     | 428      | 452      | 399     | 0.83                |
| II    | 153      | 153      | 145     | 0.90                |
| III   | 1554     | 1524     | 1351    | 0.78                |
| IV    | 114      | 117      | 111     | 0.93                |
| V     | 36       | 35       | 35      | 0.97                |
| VI    | 310      | 293      | 275     | 0.84                |
| VII   | 28       | 39       | 26      | 0.63                |
| VIII  | 17       | 17       | 17      | 1                   |
| IX    | 208      | 215      | 199     | 0.89                |
| X     | 54       | 86       | 49      | 0.54                |
| XI    | 16       | 15       | 15      | 0.94                |
| XII   | 14       | 14       | 14      | 1                   |
| XIII  | 2183     | 2445     | 2029    | 0.78                |
