# Supplementary material for: Biosynthetic Potentials of Metabolites and Their Hierarchical Organization
Source: PubMed Central journal article supplement (PMC2289774; doi:10.1371/journal.pcbi.1000049), 2008-04-04
Supplement: pcbi.1000049.s007.pdf [file pcbi.1000049.s007.pdf]

Table S3: **The effect of oxygen on the clustering results and the consensus scopes.** Shown are the sizes of the clusters (upper part) and of the consensus scopes (lower part), as determined with and without oxygen in the seed. Also shown are the overlaps and Jaccard coefficients of corresponding sets. Both results have been derived for the network extracted from the newest version of the KEGG database (December 2007).

| <b>Clusters</b> |             |                |         |                     |  |
|-----------------|-------------|----------------|---------|---------------------|--|
| Label           | with oxygen | without oxygen | overlap | Jaccard coefficient |  |
| I               | 306         | 227            | 227     | 0.74                |  |
| II              | 217         | 158            | 158     | 0.72                |  |
| III             | 103         | 100            | 100     | 0.97                |  |
| IV              | 59          | 59             | 53      | 0.82                |  |
| V               | 43          | 32             | 31      | 0.70                |  |
| VI              | 25          | 22             | 22      | 0.88                |  |
| VII             | 34          | 19             | 19      | 0.56                |  |
| VIII            | 22          | 5              | 5       | 0.23                |  |
| IX              | 19          | 15             | 15      | 0.79                |  |
| X               | 12          | 12             | 12      | 1                   |  |
| XI              | 10          | 8              | 8       | 0.8                 |  |
| XII             | 10          | 8              | 8       | 0.8                 |  |
| XIII            | 9           | 9              | 9       | 1                   |  |

| <b>Consensus scopes</b> |             |                |         |                     |  |
|-------------------------|-------------|----------------|---------|---------------------|--|
| Label                   | with oxygen | without oxygen | overlap | Jaccard coefficient |  |
| I                       | 452         | 452            | 452     | 1                   |  |
| II                      | 153         | 153            | 153     | 1                   |  |
| III                     | 1524        | 1524           | 1524    | 1                   |  |
| IV                      | 117         | 117            | 117     | 1                   |  |
| V                       | 35          | 26             | 26      | 0.74                |  |
| VI                      | 293         | 293            | 293     | 1                   |  |
| VII                     | 39          | 39             | 39      | 1                   |  |
| VIII                    | 17          | 9              | 9       | 0.53                |  |
| IX                      | 215         | 215            | 215     | 1                   |  |
| X                       | 86          | 83             | 83      | 0.97                |  |
| XI                      | 15          | 12             | 12      | 0.8                 |  |
| XII                     | 14          | 14             | 14      | 1                   |  |
| XIII                    | 2445        | 2445           | 2445    | 1                   |  |
